# Supplementary material
Source: publisher figshare collection journal article supplement (https://frontiersin.figshare.com/ndownloader/files/24381671)
Supplement: Supplementary file [file 24381671]

## Supplementary Material

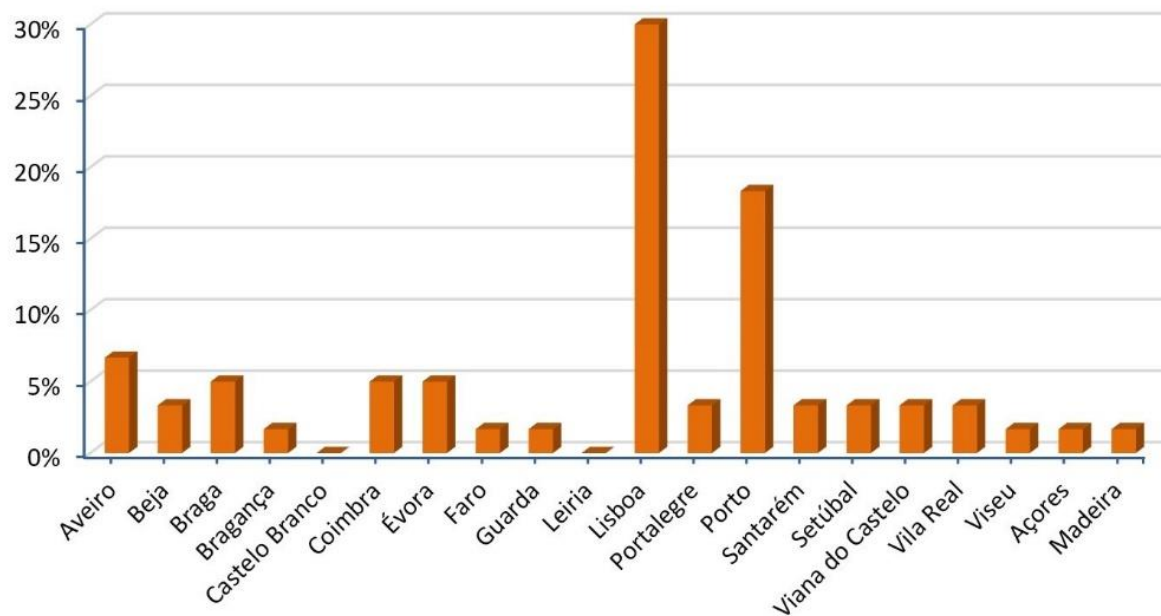

**Supplementary Figure 1.** Geographical distribution in terms of professional activity. Ten participants (32%) selected two or more districts/regions (n = 60).
